# Supplementary material for: Super-Branched PdCu Alloy for Efficiently Converting Carbon Dioxide to Carbon Monoxide
Source: MDPI journal article supplement (doi:10.3390/nano13030603), 2023-02-02
Supplement: s1 [file s1]

# **Supplementary materials for**

## **Super-branched PdCu alloy for efficiently converting carbon dioxide to carbon monoxide**

**Kaili Bao <sup>1</sup>, Yunjie Zhou <sup>1</sup>, Jie Wu <sup>1</sup>, Zenan Li <sup>1</sup>, Xiong Yan <sup>1</sup>, Hui Huang <sup>1\*</sup>, Yang Liu <sup>1\*</sup> and Zhenhui Kang <sup>1,2</sup>**

<sup>1</sup> Institute of Functional Nano & Soft Materials (FUNSOM), Jiangsu Key Laboratory of Advanced Negative Carbon Technologies, Soochow University, Suzhou, 215123, Jiangsu, PR China

<sup>2</sup> Macao Institute of Materials Science and Engineering (MIMSE), MUST-SUDA Joint Research Center for Advanced Functional Materials, Macau University of Science and Technology, Taipa 999078, Macao, China

\* Correspondence: hhuang0618@suda.edu.cn; yangl@suda.edu.cn

## 1. Experimental Section

### 1.1. Instruments

The crystal structure of the catalysts was characterized by X-ray diffraction (XRD) using an X'Pert-ProMPD (Holand) D/max- $\gamma$ AX-ray diffractometer with Cu K $\alpha$  radiation ( $\lambda = 0.154178$  nm). Scanning electron microscopy (SEM) images were obtained with a ZEISS G500 scanning electron microscope with an acceleration voltage of 20 kV. Transmission electron microscope (TEM) and high-resolution TEM (HRTEM) images were obtained with a FEI-Tecnai F20 (200kV) instrument. X-ray photoelectron spectroscopy (XPS) was obtained by using a KRATOS Axis ultra-DLD X-ray photoelectron spectrometer with a monochromated Mg K $\alpha$  X-ray source ( $h\nu = 1283.3$  eV). The CO<sub>2</sub> adsorption was determined by plotting the adsorption isotherm of CO<sub>2</sub> at 25°C obtained using a Micromeritics ASAP 2050 instrument. The electrocatalysis actions were tested by a Model CHI 760C workstation (CH Instruments, Chenhua, Shanghai, China).

### 1.2. Transient photovoltage (TPV) measurements

The TPV measurements were conducted under room temperature on platinum net covered with power sample (1 cm $\times$ 1 cm) as the working electrodes and Pt wire as the counter electrodes. The TPV was excited with a nanosecond laser radiation pulse (wavelength of 355 nm and the repetition rate was 5 Hz) from a third harmonic Nd : YAG laser (Beamtech Optronics Co., Ltd.). The TPV signals were amplified by an amplifier and were recorded by an oscilloscope. All measurements were performed at room temperature and under ambient pressure.

## 2. Supplementary Tables and Figures

**Table S1.** The molar ratio of Pd and Cu in PdCu alloys determined by the feed ratio of precursors and the mass ratio of Pd and Cu in PdCu alloys determined by ICP-OES.

| Catalyst | Molar ratio (Pd : Cu) | Mass ratio (Pd : Cu) |
|----------|-----------------------|----------------------|
| PdCu-1   | 4 : 1                 | 83 : 17              |
| PdCu-2   | 1 : 2                 | 60 : 40              |
| PdCu-3   | 1 : 4                 | 49 : 51              |

**Table S2.** The content ratio of the Pd<sup>2+</sup> and Pd<sup>0</sup> in pure Pd and PdCu alloys.

| Ratio  | Pd <sup>2+</sup> /Pd <sup>0</sup> |
|--------|-----------------------------------|
| Pd     | 1 : 3.6                           |
| PdCu-1 | 1 : 2.5                           |
| PdCu-2 | 1 : 1.8                           |
| PdCu-3 | 1 : 0.9                           |

**Table S3.** The content ratio of the Cu<sup>2+</sup> and Cu<sup>0</sup> in pure Cu and PdCu alloys.

| <b>Ratio</b> | <b>Cu<sup>2+</sup>/Cu<sup>0</sup></b> |
|--------------|---------------------------------------|
| Cu           | 1 : 5.6                               |
| PdCu-1       | 1 : 3.5                               |
| PdCu-2       | 1 : 1.9                               |
| PdCu-3       | 1 : 1.5                               |

**Table S4.** Comparison of different catalysts in electrochemical CO<sub>2</sub>RR for CO formation.

| <b>Catalysts</b>                  | <b>Products</b> | <b>Faradaic efficiency</b> | <b>Cell</b> | <b>Ref.</b> |
|-----------------------------------|-----------------|----------------------------|-------------|-------------|
| PdCu alloy                        | CO              | 85%                        | H-cell      | This work   |
| Ordered CuPd bimetal              | CO              | 80%                        | H-cell      | [43]        |
| PdCu alloy                        | CO              | 82%                        | GDE-cell    | [44]        |
| M-Pd <sub>7</sub> Cu <sub>3</sub> | CO              | 80%                        | H-cell      | [45]        |
| FL-Pd <sub>3</sub> Cu             | CO              | 82.1%                      | H-cell      | [46]        |
| CuIn                              | CO              | 68.25                      | H-cell      | [47]        |
| Cu <sub>9</sub> Au <sub>91</sub>  | CO              | 75%                        | H-cell      | [48]        |
| PdTe/CeO <sub>2</sub>             | CO              | 84%                        | H-cell      | [49]        |

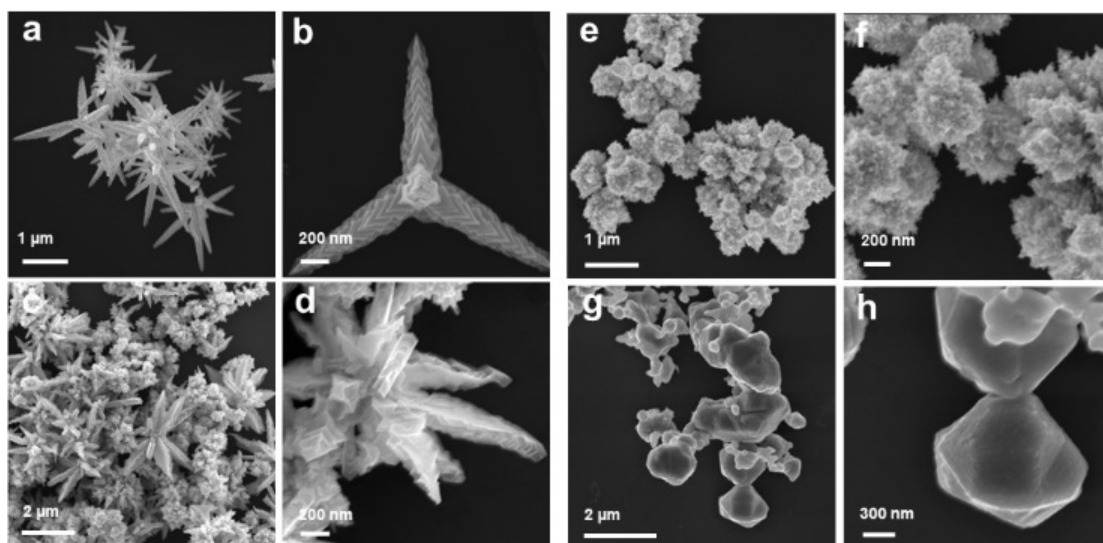

**Figure S1.** SEM images of Pd, PdCu-1, PdCu-3, and Cu. (a), (b) The SEM images of Pd. (c), (d) The SEM images of PdCu-1. (e), (f) The SEM images of PdCu-3. (g), (h) The SEM images of Cu.

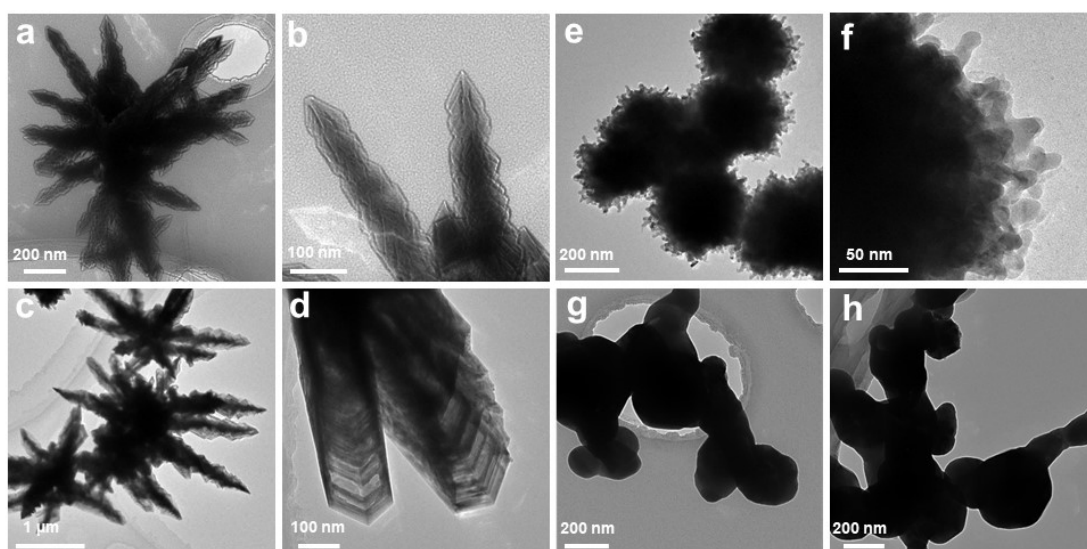

**Figure S2.** TEM images of Pd, PdCu-1, PdCu-3, and Cu. (a), (b) The TEM images of Pd. (c), (d) The TEM images of PdCu-1. (e), (f) The TEM images of PdCu-3. (g), (h) The TEM images of Cu.

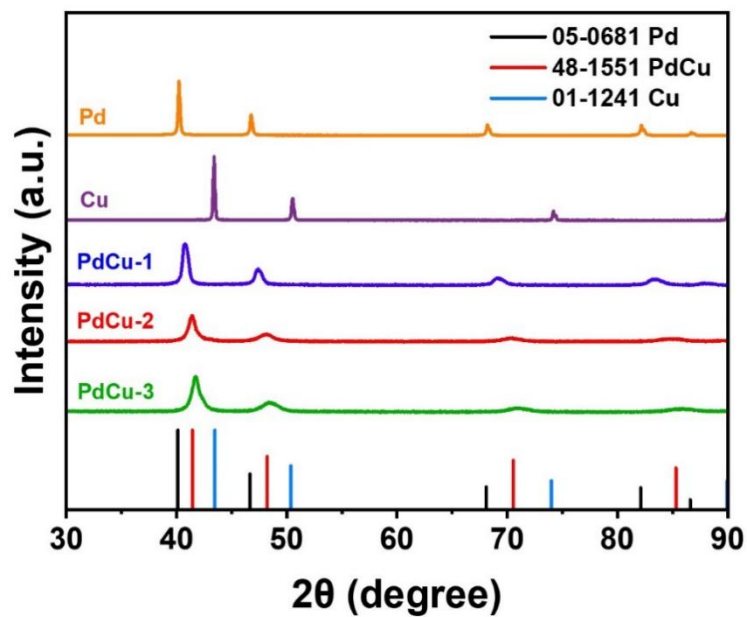

Figure S3. The XRD pattern of Pd, Cu, PdCu-1, PdCu-2, and PdCu-3.

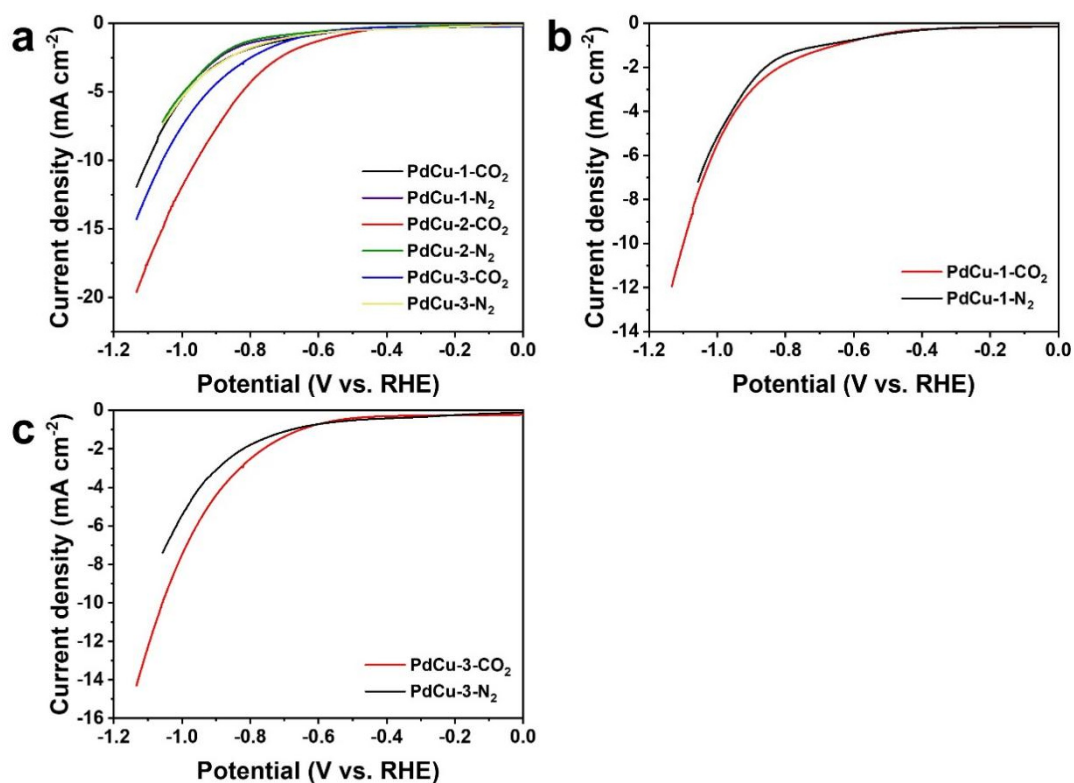

Figure S4. (a) LSV curves of PdCu alloys in CO<sub>2</sub> and N<sub>2</sub>-saturated 0.5 M KHCO<sub>3</sub> solution; (b) LSV curves of PdCu-1 in CO<sub>2</sub> (red line) and N<sub>2</sub>-saturated (black line) 0.5 M KHCO<sub>3</sub> solution; (c) LSV curves of PdCu-3 in CO<sub>2</sub> (red line) and N<sub>2</sub>-saturated (black line) 0.5 M KHCO<sub>3</sub> solution.

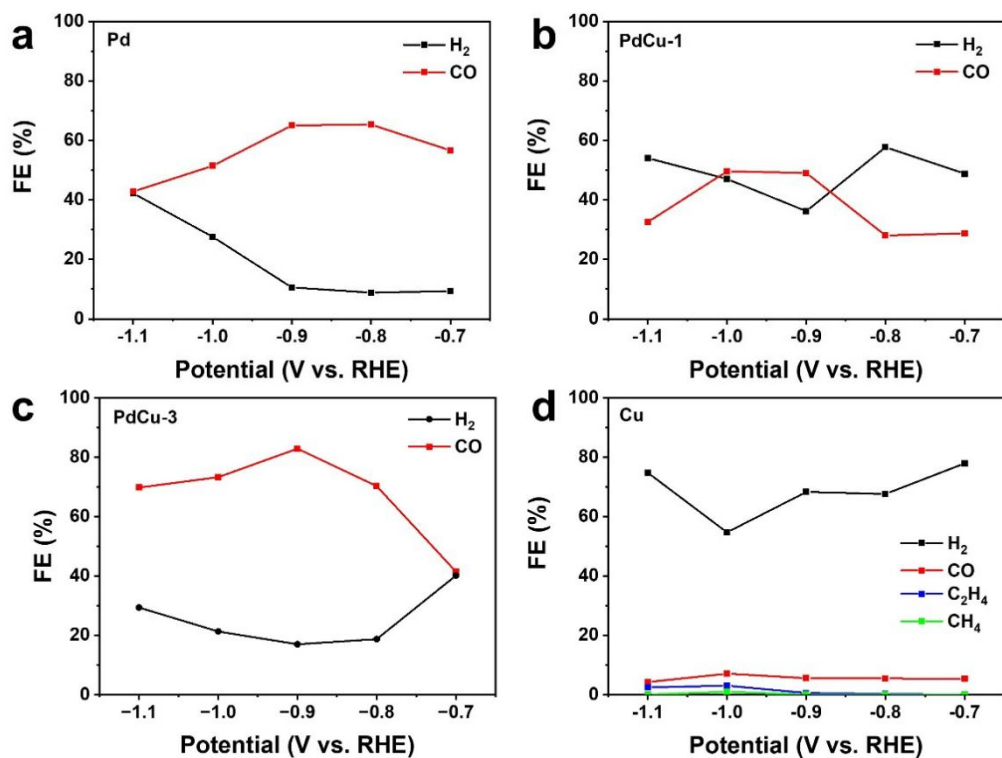

**Figure S5.** FEs. (a) FE of CO and H<sub>2</sub> on Pd; (b) FE of CO and H<sub>2</sub> on PdCu-1; (c) FE of CO and H<sub>2</sub> on PdCu-3. (d) FE of carbon products and H<sub>2</sub> on Cu.

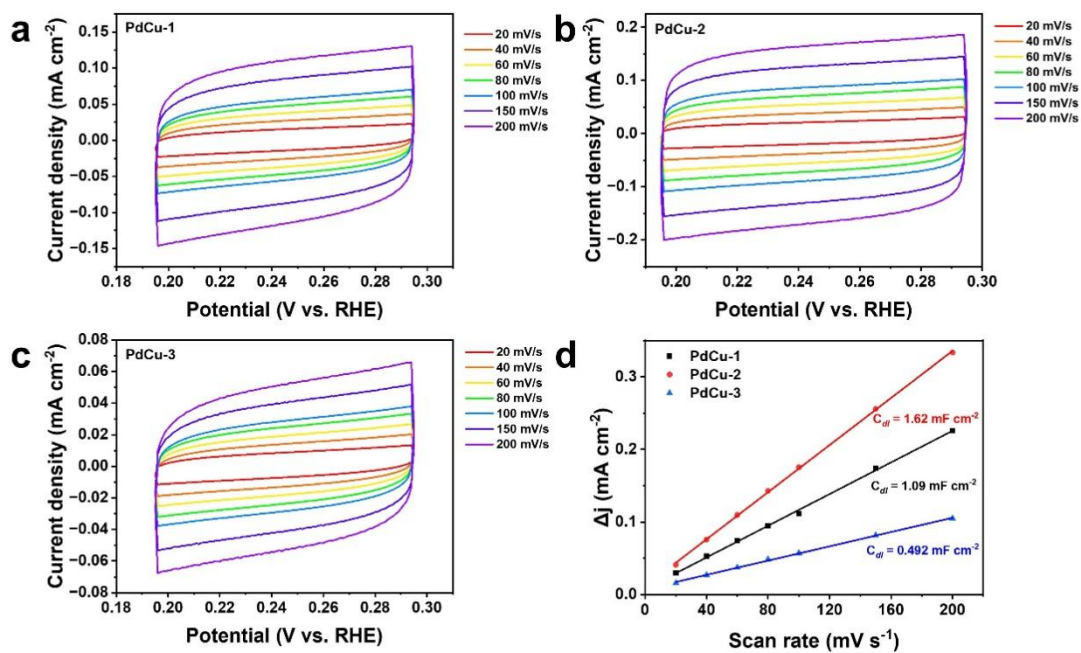

**Figure S6.** Cyclic voltammetry obtained at various scan rates of (a) PdCu-1; (b) PdCu-2; (c) PdCu-3; (d)  $C_{dl}$  of PdCu-1, PdCu-2, and PdCu-3 in 0.5 M KHCO<sub>3</sub> aqueous electrolyte.

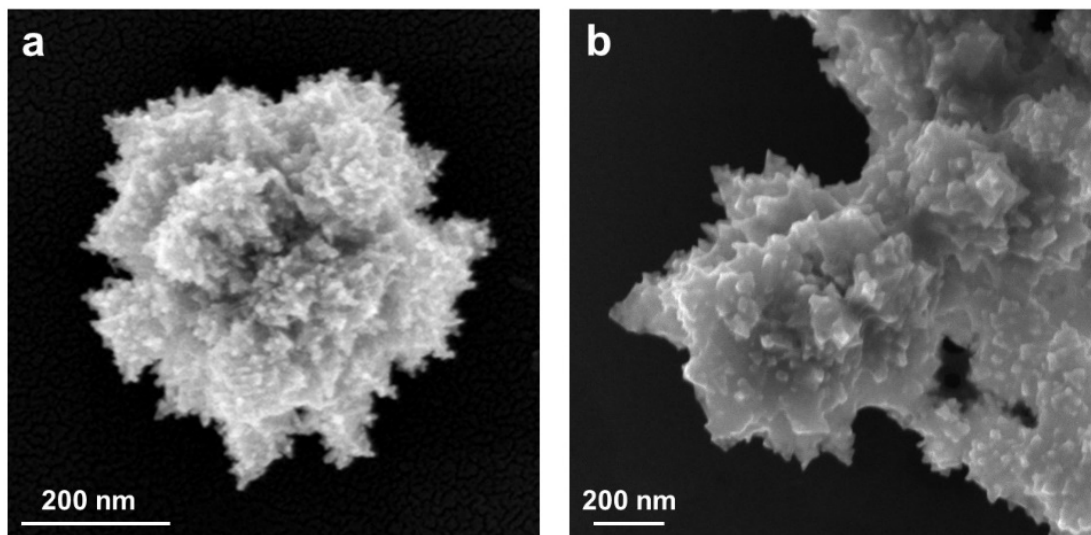

Figure S7. (a) The SEM image of PdCu-2 before reaction; (b) the SEM image of PdCu-2 after reaction.

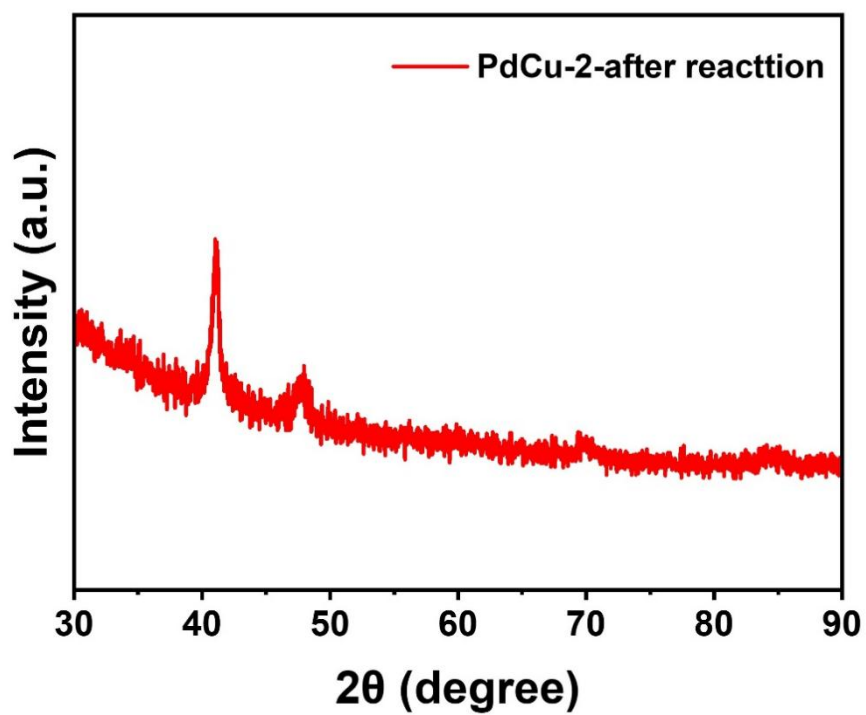

Figure S8. The XRD pattern of PdCu-2 after reaction.
